# Supplementary material
Source: PubMed Central journal article supplement (PMC6061219)
Supplement: jc.2017-01531_supplemental_table_1.pdf [file jc.2017-01531_supplemental_table_1.pdf]

1 Supplemental Table 1. Loci associated with BMI with Conditional FDR on FN BMD smaller than 0.05.

| SNP        | ROLE           | GENE          | CHR   | A1 | A2 | P. BMI   | P. FN_BMD | cFDR.<br>BMI FN_BMD |
|------------|----------------|---------------|-------|----|----|----------|-----------|---------------------|
| rs4348675  | intronic       | NEGR1         | chr1  | T  | C  | 5.88E-08 | 6.30E-02  | 4.85E-04            |
| rs3759579  | upstream       | MARK3         | chr14 | A  | G  | 2.18E-05 | 3.31E-05  | 7.43E-04            |
| rs6940832  | intergenic     | TFAP2B PKHD1  | chr6  | G  | A  | 1.02E-07 | 1.22E-01  | 7.89E-04            |
| rs4074720  | intronic       | TCF7L2        | chr10 | C  | T  | 6.41E-08 | 2.02E-01  | 8.05E-04            |
| rs2235569  | intronic       | C6orf106      | chr6  | C  | T  | 9.64E-08 | 3.40E-01  | 1.00E-03            |
| rs6499646  | intronic       | FTO           | chr16 | T  | C  | 9.17E-08 | 8.48E-01  | 1.04E-03            |
| rs546217   | intronic       | EFR3B         | chr2  | A  | C  | 1.12E-07 | 9.79E-01  | 1.10E-03            |
| rs16952522 | intronic       | FTO           | chr16 | C  | G  | 8.47E-08 | 4.37E-01  | 1.12E-03            |
| rs7719067  | intergenic     | MFAP3 GALNT10 | chr5  | A  | G  | 7.09E-08 | 8.40E-01  | 1.19E-03            |
| rs8063946  | intronic       | FTO           | chr16 | C  | T  | 1.30E-07 | 5.35E-01  | 1.20E-03            |
| rs7203219  | intergenic     | GPR139 GP2    | chr16 | T  | C  | 8.16E-08 | 5.56E-01  | 1.37E-03            |
| rs3828137  | intronic       | SEC16B        | chr1  | G  | A  | 6.01E-08 | 5.77E-01  | 1.39E-03            |
| rs11663558 | intronic       | NPC1          | chr18 | G  | A  | 5.20E-08 | 2.82E-01  | 1.80E-03            |
| rs1549979  | intronic       | CADM2         | chr3  | C  | T  | 2.71E-07 | 5.63E-01  | 1.84E-03            |
| rs9381908  | intergenic     | TFAP2B PKHD1  | chr6  | G  | A  | 2.88E-07 | 7.28E-01  | 1.94E-03            |
| rs4807189  | intronic       | CSNK1G2       | chr19 | A  | C  | 4.39E-07 | 6.11E-01  | 2.02E-03            |
| rs7239883  | ncRNA_intronic | LINC00907     | chr18 | G  | A  | 3.14E-07 | 9.80E-01  | 2.06E-03            |
| rs6760328  | intronic       | ADCY3         | chr2  | T  | C  | 5.80E-08 | 6.04E-01  | 2.11E-03            |
| rs1362571  | intronic       | FTO           | chr16 | G  | T  | 2.52E-07 | 4.84E-01  | 2.11E-03            |
| rs1979755  | intronic       | KCNG3         | chr2  | G  | C  | 4.33E-07 | 6.76E-01  | 2.20E-03            |
| rs10499694 | intronic       | DDC           | chr7  | A  | G  | 4.72E-07 | 6.66E-01  | 2.22E-03            |
| rs4949662  | intronic       | ZZZ3          | chr1  | A  | G  | 4.98E-07 | 7.47E-01  | 2.23E-03            |
| rs9469914  | intronic       | UHRF1BP1      | chr6  | A  | T  | 2.93E-07 | 3.37E-01  | 2.41E-03            |
| rs4704200  | intergenic     | ANKRD31 HMGCR | chr5  | G  | T  | 5.92E-07 | 6.47E-01  | 2.56E-03            |
| rs7633265  | intronic       | ACAP2         | chr3  | A  | G  | 6.62E-07 | 6.95E-01  | 2.64E-03            |

|            |            |                           |       |   |   |          |          |          |
|------------|------------|---------------------------|-------|---|---|----------|----------|----------|
| rs2943636  | intergenic | LOC646736 MIR5702         | chr2  | G | A | 4.02E-07 | 3.28E-01 | 2.69E-03 |
| rs12071803 | intergenic | LOC101928241 PTBP2        | chr1  | G | A | 7.42E-07 | 9.17E-01 | 3.03E-03 |
| rs11688816 | intronic   | EHBP1                     | chr2  | G | A | 3.80E-07 | 2.69E-01 | 3.15E-03 |
| rs9844271  | intergenic | LOC344887 ETV5            | chr3  | G | T | 1.38E-06 | 3.50E-01 | 3.93E-03 |
| rs2197988  | intronic   | NRXN3                     | chr14 | A | G | 9.34E-07 | 1.43E-01 | 4.21E-03 |
| rs7593130  | intronic   | ADCY3                     | chr2  | T | C | 1.27E-06 | 8.70E-01 | 4.28E-03 |
| rs7503807  | intronic   | RPTOR                     | chr17 | A | C | 5.73E-07 | 2.45E-01 | 4.33E-03 |
| rs12681744 | intergenic | HNF4G LINC01111           | chr8  | A | G | 1.01E-06 | 1.71E-01 | 4.34E-03 |
| rs11915638 | intronic   | CADM2                     | chr3  | A | G | 7.18E-07 | 4.96E-02 | 4.71E-03 |
| rs7929500  | intronic   | STK33                     | chr11 | G | A | 1.56E-06 | 6.86E-01 | 4.76E-03 |
| rs1561277  | intronic   | ZRANB3                    | chr2  | C | A | 7.85E-07 | 1.98E-01 | 4.84E-03 |
| rs2444217  | intronic   | ADCY9                     | chr16 | G | A | 1.92E-06 | 7.04E-01 | 4.91E-03 |
| rs7433760  | intronic   | ETV5                      | chr3  | A | G | 1.02E-06 | 1.18E-01 | 5.08E-03 |
| rs751008   | intronic   | DOCK1                     | chr10 | G | A | 1.64E-06 | 9.09E-01 | 5.13E-03 |
| rs9381901  | intergenic | TFAP2D TFAP2B             | chr6  | A | G | 1.77E-06 | 4.49E-01 | 5.36E-03 |
| rs570762   | intergenic | LOC101928778 SEC16B       | chr1  | T | C | 1.82E-06 | 2.65E-01 | 5.38E-03 |
| rs10057590 | intergenic | ZNF60 LOC101927421        | chr5  | A | C | 1.72E-06 | 4.97E-01 | 5.45E-03 |
| rs9659092  | intronic   | AGBL4                     | chr1  | A | G | 1.86E-06 | 9.76E-01 | 5.45E-03 |
| rs1222069  | intergenic | LOC102723661 LOC101928241 | chr1  | A | C | 1.64E-06 | 2.60E-02 | 5.79E-03 |
| rs12904982 | intronic   | MAP2K5                    | chr15 | T | C | 2.03E-06 | 4.46E-01 | 5.80E-03 |
| rs574763   | intergenic | PMAIP1 MC4R               | chr18 | T | C | 2.31E-06 | 9.96E-01 | 6.15E-03 |
| rs2272908  | intronic   | GNB1                      | chr1  | C | T | 2.42E-05 | 4.94E-03 | 6.29E-03 |
| rs4771946  | intronic   | HS6ST3                    | chr13 | T | C | 2.57E-06 | 6.12E-01 | 6.52E-03 |
| rs1409818  | intergenic | NKX2-4 NKX2-2             | chr20 | C | T | 2.30E-05 | 3.43E-03 | 6.53E-03 |
| rs11079813 | intronic   | SKAP1                     | chr17 | T | C | 2.95E-06 | 6.54E-01 | 7.03E-03 |
| rs1440983  | intergenic | PRKD1 G2E3                | chr14 | G | A | 3.56E-06 | 7.46E-01 | 7.26E-03 |
| rs10032137 | intergenic | GNPDA2 GABRG1             | chr4  | G | C | 2.87E-06 | 4.89E-01 | 7.71E-03 |
| rs9408902  | intergenic | ASTN2 LOC101928797        | chr9  | A | G | 3.06E-06 | 4.18E-01 | 7.78E-03 |

|            |                |                        |       |   |   |          |          |          |
|------------|----------------|------------------------|-------|---|---|----------|----------|----------|
| rs9983113  | intergenic     | LOC400867 LOC101928435 | chr21 | G | T | 3.81E-06 | 4.98E-01 | 7.91E-03 |
| rs998584   | intergenic     | VEGFA LINC01512        | chr6  | C | A | 2.89E-06 | 3.23E-01 | 8.14E-03 |
| rs7551794  | intergenic     | PTBP2 DPYD             | chr1  | A | T | 3.81E-06 | 9.81E-01 | 8.16E-03 |
| rs17326595 | intergenic     | KCTD15 LSM14A          | chr19 | C | T | 3.44E-06 | 4.41E-01 | 8.37E-03 |
| rs9966504  | intergenic     | PMAIP1 MC4R            | chr18 | C | T | 2.99E-06 | 3.21E-01 | 8.41E-03 |
| rs1546924  | intronic       | FAM212B                | chr1  | T | C | 4.93E-06 | 7.16E-01 | 8.83E-03 |
| rs11064524 | intronic       | WNK1                   | chr12 | T | G | 5.16E-06 | 7.56E-01 | 9.01E-03 |
| rs12598706 | intronic       | PDILT                  | chr16 | C | T | 4.34E-06 | 8.16E-01 | 9.05E-03 |
| rs9275595  | intergenic     | HLA-DQB1 HLA-DQA2      | chr6  | T | C | 5.64E-06 | 5.03E-01 | 9.79E-03 |
| rs1225051  | intronic       | CPNE4                  | chr3  | G | A | 5.23E-06 | 4.64E-01 | 9.80E-03 |
| rs2150855  | intronic       | LINGO2                 | chr9  | T | C | 3.52E-06 | 1.58E-01 | 9.97E-03 |
| rs4144743  | intergenic     | MYL4 ITGB3             | chr17 | T | C | 4.84E-06 | 4.43E-01 | 1.00E-02 |
| rs1861569  | intergenic     | MIR5095 CBLN1          | chr16 | T | C | 5.67E-06 | 8.93E-01 | 1.03E-02 |
| rs285556   | intronic       | PDZRN4                 | chr12 | C | T | 6.80E-06 | 7.15E-01 | 1.08E-02 |
| rs9639027  | upstream       | ZNF12                  | chr7  | T | C | 4.50E-06 | 3.08E-01 | 1.13E-02 |
| rs9296115  | intronic       | PACSIN1                | chr6  | A | C | 6.80E-06 | 9.04E-01 | 1.13E-02 |
| rs9960448  | intergenic     | PMAIP1 MC4R            | chr18 | G | T | 7.04E-06 | 2.83E-01 | 1.22E-02 |
| rs4937993  | intronic       | NCAM1                  | chr11 | A | G | 4.70E-06 | 1.89E-01 | 1.23E-02 |
| rs7048106  | ncRNA_intronic | MIR1268A               | chr9  | A | G | 8.81E-06 | 7.59E-01 | 1.26E-02 |
| rs1333010  | intergenic     | LOC102723968 LINC01052 | chr13 | G | A | 7.64E-06 | 9.80E-01 | 1.27E-02 |
| rs2033530  | downstream     | TDRG1                  | chr6  | A | G | 8.22E-06 | 3.91E-01 | 1.30E-02 |
| rs3922649  | intergenic     | LOC101928778 SEC16B    | chr1  | A | G | 6.72E-06 | 2.86E-01 | 1.31E-02 |
| rs3105748  | intronic       | SLC22A3                | chr6  | C | T | 8.44E-06 | 8.77E-01 | 1.33E-02 |
| rs2074120  | intronic       | CALCR                  | chr7  | A | C | 8.81E-06 | 3.34E-01 | 1.34E-02 |
| rs2685230  | intergenic     | FAM150B TMEM18         | chr2  | A | G | 4.88E-06 | 8.48E-02 | 1.34E-02 |
| rs4304326  | intergenic     | DUSP26 LINC01288       | chr8  | G | C | 9.32E-06 | 3.70E-01 | 1.36E-02 |
| rs12454712 | intronic       | BCL2                   | chr18 | T | C | 6.04E-06 | 1.47E-01 | 1.40E-02 |
| rs7228347  | intergenic     | MC4R CDH20             | chr18 | T | G | 9.41E-06 | 6.42E-01 | 1.40E-02 |

|            |                |                     |       |   |   |          |          |          |
|------------|----------------|---------------------|-------|---|---|----------|----------|----------|
| rs11625620 | intronic       | NRXN3               | chr14 | C | T | 1.03E-05 | 4.92E-01 | 1.43E-02 |
| rs836964   | intronic       | FAIM2               | chr12 | A | G | 8.05E-06 | 2.32E-01 | 1.44E-02 |
| rs6723710  | ncRNA_intronic | LINC01122           | chr2  | C | A | 1.00E-05 | 4.83E-01 | 1.46E-02 |
| rs9357506  | intronic       | RCAN2               | chr6  | A | G | 6.80E-06 | 1.37E-01 | 1.47E-02 |
| rs17819063 | intronic       | FTO                 | chr16 | G | A | 1.07E-05 | 6.55E-01 | 1.48E-02 |
| rs12928335 | intergenic     | AKTIP RPGRIP1L      | chr16 | C | T | 1.14E-05 | 6.75E-01 | 1.55E-02 |
| rs1530559  | intronic       | MAP3K19             | chr2  | A | G | 6.79E-06 | 5.53E-02 | 1.64E-02 |
| rs17218700 | intronic       | FTO                 | chr16 | G | A | 1.28E-05 | 5.13E-01 | 1.65E-02 |
| rs8106922  | intronic       | TOMM40              | chr19 | A | G | 1.27E-05 | 6.72E-01 | 1.71E-02 |
| rs10971712 | intronic       | UBE2R2              | chr9  | C | T | 1.51E-05 | 8.18E-01 | 1.83E-02 |
| rs2161767  | intergenic     | MIR1302-4 CREB1     | chr2  | A | G | 1.47E-05 | 4.57E-01 | 1.85E-02 |
| rs13432055 | intronic       | CCDC85A             | chr2  | T | C | 1.14E-05 | 3.07E-01 | 1.86E-02 |
| rs849135   | intronic       | JAZF1               | chr7  | G | A | 1.45E-05 | 6.08E-01 | 1.89E-02 |
| rs559431   | intronic       | KDM1A               | chr1  | T | C | 1.38E-05 | 4.00E-01 | 1.92E-02 |
| rs740157   | intergenic     | LOC101927243 PTPN12 | chr7  | A | G | 1.70E-05 | 6.44E-01 | 1.94E-02 |
| rs5862     | UTR3           | LOC728392           | chr17 | A | G | 1.73E-05 | 3.74E-01 | 1.97E-02 |
| rs1275985  | intergenic     | CIB4 KCNK3          | chr2  | C | T | 1.73E-05 | 9.09E-01 | 1.99E-02 |
| rs2770102  | ncRNA_intronic | CASC15              | chr6  | G | A | 1.66E-05 | 4.75E-01 | 1.99E-02 |
| rs2677031  | intergenic     | CALCR MIR4652       | chr7  | T | C | 1.63E-05 | 3.67E-01 | 2.03E-02 |
| rs10774625 | intronic       | ATXN2               | chr12 | A | G | 1.28E-05 | 1.21E-02 | 2.25E-02 |
| rs231976   | intergenic     | IL27 NUPR1          | chr16 | G | C | 2.14E-05 | 1.49E-02 | 2.27E-02 |
| rs10753176 | intergenic     | SEC16B LOC730102    | chr1  | C | A | 1.47E-05 | 2.55E-01 | 2.30E-02 |
| rs2225203  | intergenic     | LINC01065 LINC00558 | chr13 | T | A | 1.47E-05 | 1.93E-01 | 2.35E-02 |
| rs4980550  | intergenic     | MYEOV LINC01488     | chr11 | C | T | 1.67E-05 | 2.55E-01 | 2.38E-02 |
| rs882386   | intronic       | DMXL2               | chr15 | G | A | 2.14E-05 | 9.49E-01 | 2.44E-02 |
| rs11022762 | intronic       | ARNTL               | chr11 | C | T | 1.95E-05 | 2.79E-02 | 2.46E-02 |
| rs11039345 | intronic       | AGBL2               | chr11 | A | G | 2.51E-05 | 3.83E-01 | 2.55E-02 |
| rs12406019 | intergenic     | GIPC2 MGC27382      | chr1  | A | G | 2.61E-05 | 3.44E-01 | 2.62E-02 |

|            |                |                        |       |   |   |          |          |          |
|------------|----------------|------------------------|-------|---|---|----------|----------|----------|
| rs619824   | intergenic     | WBP1L CYP17A1          | chr10 | A | C | 2.76E-05 | 1.59E-01 | 2.62E-02 |
| rs1609761  | intronic       | REXO1                  | chr19 | A | C | 3.62E-05 | 5.60E-02 | 2.66E-02 |
| rs3814878  | UTR5           | FAM57B                 | chr16 | A | G | 2.80E-05 | 2.07E-01 | 2.66E-02 |
| rs1473     | intronic       | PUM1                   | chr1  | G | A | 4.89E-04 | 2.67E-04 | 2.66E-02 |
| rs11674696 | intergenic     | MIR1302-4 CREB1        | chr2  | T | C | 2.76E-05 | 6.33E-01 | 2.73E-02 |
| rs9322955  | intergenic     | NFKBIA INSM2           | chr14 | A | G | 2.74E-05 | 4.29E-01 | 2.75E-02 |
| rs2524099  | downstream     | HLA-C                  | chr6  | G | A | 2.63E-05 | 1.41E-01 | 2.76E-02 |
| rs6795735  | ncRNA_intronic | ADAMTS9-AS2            | chr3  | C | T | 2.92E-05 | 2.28E-01 | 2.84E-02 |
| rs10769933 | UTR3           | TRIM66                 | chr11 | G | C | 2.82E-05 | 9.39E-02 | 2.85E-02 |
| rs6510001  | intergenic     | URI1 ZNF536            | chr19 | T | G | 2.73E-05 | 8.64E-01 | 2.86E-02 |
| rs1433075  | intronic       | ZNF536                 | chr19 | G | T | 1.53E-05 | 1.34E-01 | 2.87E-02 |
| rs11630705 | intronic       | ADAMTSL3               | chr15 | G | C | 1.10E-04 | 7.22E-03 | 2.99E-02 |
| rs2178950  | intronic       | TRPS1                  | chr8  | G | C | 8.86E-04 | 3.95E-04 | 3.06E-02 |
| rs889203   | intronic       | GPR139                 | chr16 | C | T | 3.04E-05 | 9.65E-01 | 3.09E-02 |
| rs16969473 | intronic       | GPR139                 | chr16 | A | G | 3.36E-05 | 6.33E-01 | 3.12E-02 |
| rs1320252  | intergenic     | MAP2K3 KCNJ12          | chr17 | T | C | 3.55E-05 | 7.68E-01 | 3.21E-02 |
| rs1275691  | intronic       | GALNT16                | chr14 | G | A | 6.24E-05 | 3.11E-02 | 3.27E-02 |
| rs17231277 | intergenic     | LOC101928435 PSMG1     | chr21 | C | T | 3.68E-05 | 3.17E-01 | 3.40E-02 |
| rs10075465 | intronic       | POC5                   | chr5  | C | G | 3.82E-05 | 1.42E-01 | 3.43E-02 |
| rs283553   | intergenic     | TFAP2B PKHD1           | chr6  | C | G | 1.69E-05 | 1.14E-01 | 3.52E-02 |
| rs7586043  | intergenic     | LINC01320 LOC100288911 | chr2  | G | A | 3.94E-05 | 7.99E-01 | 3.57E-02 |
| rs9825174  | intronic       | XXYLT1                 | chr3  | C | T | 7.13E-04 | 2.50E-04 | 3.64E-02 |
| rs6867577  | intronic       | FBXL17                 | chr5  | C | A | 4.18E-05 | 7.57E-01 | 3.65E-02 |
| rs11652097 | intergenic     | MYL4 ITGB3             | chr17 | C | T | 4.28E-05 | 1.42E-01 | 3.81E-02 |
| rs2280018  | intronic       | PDXDC1                 | chr16 | A | C | 4.70E-05 | 5.10E-01 | 3.81E-02 |
| rs3776569  | intronic       | SLC1A3                 | chr5  | G | A | 4.80E-05 | 4.96E-01 | 3.95E-02 |
| rs7594432  | intronic       | DNMT3A                 | chr2  | T | C | 4.62E-05 | 5.70E-01 | 3.97E-02 |
| rs17049738 | ncRNA_intronic | LINC01122              | chr2  | A | C | 4.36E-05 | 9.42E-01 | 4.07E-02 |

|            |            |                     |       |   |   |          |          |          |
|------------|------------|---------------------|-------|---|---|----------|----------|----------|
| rs10489882 | intronic   | SEC16B              | chr1  | T | C | 7.19E-05 | 4.10E-02 | 4.38E-02 |
| rs984677   | intergenic | CASC20 BMP2         | chr20 | A | G | 5.63E-05 | 1.49E-01 | 4.39E-02 |
| rs10934987 | intronic   | CPNE4               | chr3  | T | C | 5.03E-05 | 8.66E-01 | 4.48E-02 |
| rs704084   | intergenic | DUSP6 POC1B         | chr12 | T | C | 5.39E-05 | 5.51E-01 | 4.48E-02 |
| rs621042   | intronic   | PIK3C2G             | chr12 | C | A | 5.03E-05 | 9.34E-01 | 4.52E-02 |
| rs2710508  | intronic   | EPHA4               | chr2  | A | G | 6.85E-05 | 4.47E-02 | 4.53E-02 |
| rs10853100 | intergenic | LOC101927166 HOXB1  | chr17 | T | C | 5.63E-05 | 7.50E-01 | 4.65E-02 |
| rs2280406  | upstream   | MST1R               | chr3  | G | A | 5.63E-05 | 8.35E-01 | 4.83E-02 |
| rs732310   | intronic   | REXO1               | chr19 | G | T | 1.55E-04 | 1.32E-02 | 4.91E-02 |
| rs329655   | intergenic | IGSF9B LOC100128239 | chr11 | C | A | 5.71E-05 | 9.96E-01 | 4.95E-02 |

2 Independent gene loci ( $r^2 < 0.2$ ) with SNPs that have conditional FDR smaller than 0.05 in BMI|FN BMD. All SNPs are listed with their nearest  
3 gene(s), chromosomal location, effect allele A1, non-effect allele A2, raw p-values for univariate GWAS for each trait and cFDR values for BMI.

20 Supplemental Table 2. Loci associated with FN BMD with Conditional FDR smaller than 0.05 on BMI.

| SNP        | ROLE           | GENE                | CHR   | A1 | A2 | P.BMI    | P.FN_BMD | cFDR.      |
|------------|----------------|---------------------|-------|----|----|----------|----------|------------|
|            |                |                     |       |    |    |          |          | FN_BMD BMI |
| rs944082   | ncRNA_intronic | GNG12-AS1           | chr1  | T  | C  | 7.45E-02 | 1.04E-07 | 9.02E-04   |
| rs170635   | intronic       | LSM12               | chr17 | T  | C  | 1.32E-01 | 1.25E-07 | 9.45E-04   |
| rs2047937  | intronic       | ZNF423              | chr16 | C  | T  | 2.22E-01 | 2.10E-07 | 1.77E-03   |
| rs12365254 | intronic       | LOC102724957        | chr11 | T  | C  | 2.79E-01 | 7.97E-08 | 2.53E-03   |
| rs3759579  | upstream       | MARK3               | chr14 | A  | G  | 2.18E-05 | 3.31E-05 | 3.54E-03   |
| rs11952384 | ncRNA_intronic | MEF2C-AS1           | chr5  | A  | G  | 4.62E-01 | 3.82E-07 | 4.11E-03   |
| rs10917225 | intergenic     | MIR4418 ZBTB40      | chr1  | T  | C  | 4.42E-01 | 4.96E-07 | 5.09E-03   |
| rs1485305  | intergenic     | TNFRSF11B COLEC10   | chr8  | A  | T  | 8.93E-01 | 2.53E-07 | 5.39E-03   |
| rs9905128  | intergenic     | CASC17 LOC102723505 | chr17 | G  | A  | 9.79E-03 | 4.33E-06 | 7.05E-03   |
| rs4505759  | intergenic     | IDUA FGFRL1         | chr4  | C  | T  | 1.51E-01 | 2.21E-06 | 1.27E-02   |
| rs777354   | intergenic     | CSRNP3 GALNT3       | chr2  | A  | G  | 4.84E-01 | 2.26E-06 | 1.42E-02   |
| rs10280461 | intergenic     | EPDR1 STARD3NL      | chr7  | C  | A  | 6.85E-01 | 1.28E-06 | 1.48E-02   |
| rs10054570 | intergenic     | MEF2C-AS1 MIR3660   | chr5  | G  | T  | 3.97E-01 | 1.67E-06 | 1.53E-02   |
| rs4469491  | intergenic     | EYA1 MSC            | chr8  | C  | T  | 8.68E-01 | 1.26E-06 | 1.86E-02   |
| rs2566758  | ncRNA_intronic | GNG12-AS1           | chr1  | C  | T  | 7.25E-01 | 2.49E-06 | 1.95E-02   |
| rs10506027 | intergenic     | KLHL42 PTHLH        | chr12 | A  | C  | 6.34E-01 | 3.45E-06 | 2.58E-02   |
| rs10924510 | intronic       | GPR137B             | chr1  | C  | G  | 9.90E-01 | 3.30E-06 | 2.80E-02   |
| rs724404   | intergenic     | CYLD LOC101927334   | chr16 | C  | A  | 1.45E-02 | 3.89E-05 | 2.81E-02   |
| rs2419659  | ncRNA_intronic | GNG12-AS1           | chr1  | C  | A  | 2.93E-01 | 7.96E-06 | 2.97E-02   |
| rs6494633  | intronic       | SMAD3               | chr15 | C  | T  | 2.08E-01 | 7.59E-06 | 2.99E-02   |
| rs9350354  | intergenic     | CDKAL1 LINC00581    | chr6  | A  | G  | 2.02E-01 | 6.77E-06 | 3.12E-02   |
| rs2707183  | intergenic     | MIR4472-2 LINC00173 | chr12 | G  | T  | 1.57E-03 | 1.23E-04 | 3.31E-02   |
| rs2178950  | intronic       | TRPS1               | chr8  | G  | C  | 8.86E-04 | 3.95E-04 | 4.08E-02   |
| rs11209223 | ncRNA_intronic | GNG12-AS1           | chr1  | G  | A  | 4.33E-01 | 7.43E-06 | 4.14E-02   |
| rs1473     | intronic       | PUM1                | chr1  | G  | A  | 4.89E-04 | 2.67E-04 | 4.33E-02   |

|           |          |        |       |   |   |          |          |          |
|-----------|----------|--------|-------|---|---|----------|----------|----------|
| rs1949481 | intronic | SOX6   | chr11 | C | T | 7.66E-01 | 8.92E-06 | 4.52E-02 |
| rs9825174 | intronic | XXYLT1 | chr3  | C | T | 7.13E-04 | 2.50E-04 | 4.78E-02 |

21 Independent gene loci ( $r^2 < 0.2$ ) with SNPs that have conditional FDR smaller than 0.05 in FN BMD|BMI. All SNPs are listed with their nearest  
22 gene(s), chromosomal location, effect allele A1, non-effect allele A2, raw p-values for univariate GWAS for each trait and cFDR values for FN  
23 BMD.

24  
25  
26  
27  
28  
29  
30  
31  
32  
33  
34  
35  
36  
37  
38  
39  
40  
41  
42  
43  
44  
45  
46

47 Supplemental Table 3. Loci associated with WHR with Conditional FDR smaller than 0.05 on FN BMD.

| SNP        | ROLE           | GENE            | CHR   | A1 | A2 | P.WHR    | P.FN_BMD | cFDR.<br>WHR FN_BMD |
|------------|----------------|-----------------|-------|----|----|----------|----------|---------------------|
| rs2047937  | intronic       | ZNF423          | chr16 | C  | T  | 3.80E-04 | 2.10E-07 | 1.14E-03            |
| rs2060765  | intergenic     | NPVF MIR148A    | chr7  | T  | C  | 1.90E-06 | 1.05E-02 | 2.92E-03            |
| rs12022722 | intergenic     | LYPLAL RNU5F-1  | chr1  | C  | T  | 9.80E-08 | 3.71E-01 | 4.39E-03            |
| rs1423056  | intergenic     | SLC7A10 CEBPA   | chr19 | G  | A  | 2.20E-07 | 5.57E-01 | 4.86E-03            |
| rs17277372 | intronic       | DNM3            | chr1  | A  | G  | 1.60E-03 | 7.80E-07 | 6.40E-03            |
| rs4897200  | intergenic     | MIR588 RSPO3    | chr6  | C  | A  | 2.00E-07 | 2.95E-01 | 7.15E-03            |
| rs12133396 | intergenic     | LYPLAL1 RNU5F-1 | chr1  | G  | A  | 5.30E-07 | 8.86E-01 | 1.39E-02            |
| rs335170   | intronic       | PRDM6           | chr5  | A  | C  | 2.20E-03 | 1.80E-05 | 1.91E-02            |
| rs1294400  | intergenic     | LY86 RREB1      | chr6  | G  | A  | 1.20E-06 | 4.11E-01 | 1.97E-02            |
| rs2920499  | intergenic     | SYN2 PPARG      | chr3  | A  | G  | 6.80E-06 | 9.39E-02 | 2.04E-02            |
| rs2077111  | intergenic     | MIR588 RSPO3    | chr6  | A  | C  | 3.90E-06 | 9.38E-02 | 2.34E-02            |
| rs2077111  | intergenic     | MIR588 RSPO3    | chr6  | A  | G  | 3.90E-06 | 9.38E-02 | 2.34E-02            |
| rs9822326  | ncRNA_intronic | LINC00880       | chr3  | A  | C  | 6.10E-06 | 7.44E-02 | 2.91E-02            |
| rs11079813 | intronic       | SKAP1           | chr17 | T  | C  | 3.30E-06 | 6.54E-01 | 4.27E-02            |
| rs751008   | intronic       | DOCK1           | chr10 | G  | A  | 2.80E-06 | 9.09E-01 | 4.31E-02            |
| rs6723710  | ncRNA_intronic | LINC01122       | chr2  | C  | A  | 5.40E-06 | 4.83E-01 | 4.45E-02            |
| rs10923714 | intronic       | TBX15           | chr1  | G  | A  | 5.20E-06 | 2.09E-01 | 4.46E-02            |
| rs2485534  | intronic       | GRIN3A          | chr9  | T  | A  | 7.60E-06 | 5.20E-01 | 4.72E-02            |
| rs2903940  | intronic       | EYA2            | chr20 | A  | G  | 8.30E-06 | 6.38E-01 | 4.85E-02            |
| rs649721   | intergenic     | PMAIP1 MC4R     | chr18 | A  | C  | 4.90E-06 | 9.38E-01 | 4.95E-02            |

48 Independent gene loci ( $r^2 < 0.2$ ) with SNPs that have conditional FDR smaller than 0.05 in WHR|FN BMD. All SNPs are listed with their nearest

49 gene(s), chromosomal location, effect allele A1, non-effect allele A2, raw p-values for univariate GWAS for each trait and cFDR values for  
50 WHR.

51  
52  
53  
54  
55  
56  
57  
58  
59  
60  
61  
62  
63  
64  
65  
66  
67  
68  
69  
70  
71  
72  
73  
74  
75  
76

77 Supplemental Table 4.Loci associated with FN BMD with Conditional FDR smaller than 0.05 on WHR.

| RSID       | ROLE           | GENE                | CHR   | A1 | A2 | P.WHR    | P. FN_BMD | cFDR.      |
|------------|----------------|---------------------|-------|----|----|----------|-----------|------------|
|            |                |                     |       |    |    |          |           | FN_BMD WHR |
| rs2047937  | intronic       | ZNF423              | chr16 | C  | T  | 3.80E-04 | 2.10E-07  | 2.21E-05   |
| rs17277372 | intronic       | DNM3                | chr1  | A  | G  | 1.60E-03 | 7.80E-07  | 1.01E-04   |
| rs944082   | ncRNA_intronic | GNG12-AS1           | chr1  | T  | C  | 1.70E-01 | 1.04E-07  | 1.02E-03   |
| rs1485305  | intergenic     | TNFRSF11B COLEC10   | chr8  | A  | T  | 2.10E-01 | 2.53E-07  | 1.47E-03   |
| rs12365254 | intronic       | LOC102724957        | chr11 | T  | C  | 1.70E-01 | 7.97E-08  | 1.49E-03   |
| rs335170   | intronic       | PRDM6               | chr5  | A  | C  | 2.20E-03 | 1.80E-05  | 1.96E-03   |
| rs11952384 | ncRNA_intronic | MEF2C-AS1           | chr5  | A  | G  | 2.60E-01 | 3.82E-07  | 2.21E-03   |
| rs10917225 | intergenic     | MIR4418 ZBTB40      | chr1  | T  | C  | 1.90E-01 | 4.96E-07  | 2.58E-03   |
| rs10280461 | intergenic     | EPDR1 STARD3NL      | chr7  | C  | A  | 1.20E-01 | 1.28E-06  | 5.45E-03   |
| rs228752   | intronic       | LSM12               | chr17 | T  | C  | 8.10E-01 | 3.02E-07  | 5.75E-03   |
| rs6694387  | intronic       | DNM3                | chr1  | T  | C  | 1.20E-02 | 1.77E-05  | 7.98E-03   |
| rs10054570 | intergenic     | MEF2C-AS1 MIR3660   | chr5  | G  | T  | 5.00E-01 | 1.67E-06  | 1.06E-02   |
| rs10506027 | intergenic     | KLHL42 PTHLH        | chr12 | A  | C  | 1.30E-01 | 3.45E-06  | 1.20E-02   |
| rs2566758  | ncRNA_intronic | GNG12-AS1           | chr1  | C  | T  | 4.00E-01 | 2.49E-06  | 1.27E-02   |
| rs4759062  | intronic       | HOXC4               | chr12 | C  | T  | 2.70E-03 | 1.44E-04  | 1.36E-02   |
| rs10924510 | intronic       | GPR137B             | chr1  | C  | G  | 3.60E-01 | 3.30E-06  | 1.49E-02   |
| rs4469491  | intergenic     | EYA1 MSC            | chr8  | C  | T  | 9.80E-01 | 1.26E-06  | 1.63E-02   |
| rs777354   | intergenic     | CSRNP3 GALNT3       | chr2  | A  | G  | 6.30E-01 | 2.26E-06  | 1.67E-02   |
| rs9905128  | intergenic     | CASC17 LOC102723505 | chr17 | G  | A  | 4.00E-01 | 4.33E-06  | 1.68E-02   |
| rs724404   | intergenic     | CYLD LOC101927334   | chr16 | C  | A  | 2.00E-02 | 3.89E-05  | 1.78E-02   |
| rs9350354  | intergenic     | CDKAL1 LINC00581    | chr6  | A  | G  | 2.20E-01 | 6.77E-06  | 1.89E-02   |
| rs6494633  | intronic       | SMAD3               | chr15 | C  | T  | 1.30E-01 | 7.59E-06  | 2.22E-02   |
| rs4505759  | intergenic     | IDUA FGFRL1         | chr4  | C  | T  | 9.50E-01 | 2.21E-06  | 2.26E-02   |
| rs1949481  | intronic       | SOX6                | chr11 | C  | T  | 3.20E-01 | 8.92E-06  | 2.69E-02   |
| rs7936582  | intronic       | PPP6R3              | chr11 | T  | C  | 7.00E-02 | 1.82E-05  | 2.88E-02   |

|            |                |                    |       |   |   |          |          |          |
|------------|----------------|--------------------|-------|---|---|----------|----------|----------|
| rs11209223 | ncRNA_intronic | GNG12-AS1          | chr1  | G | A | 4.90E-01 | 7.43E-06 | 2.97E-02 |
| rs2419659  | ncRNA_intronic | GNG12-AS1          | chr1  | C | A | 6.50E-01 | 7.96E-06 | 3.35E-02 |
| rs10153941 | intergenic     | PKDCC LOC102723824 | chr2  | G | T | 2.70E-01 | 1.49E-05 | 3.71E-02 |
| rs6089336  | upstream       | OSBPL2             | chr20 | G | A | 1.90E-01 | 2.51E-05 | 4.49E-02 |
| rs4854512  | intronic       | ARHGAP25           | chr2  | A | G | 3.30E-02 | 7.24E-05 | 4.51E-02 |
| rs889012   | intronic       | TRPC7              | chr5  | G | T | 4.00E-01 | 1.86E-05 | 4.54E-02 |
| rs3759579  | upstream       | MARK3              | chr14 | A | G | 6.40E-02 | 3.31E-05 | 4.72E-02 |

78 Independent gene loci ( $r^2 < 0.2$ ) with SNPs that have conditional FDR smaller than 0.05 in FN BMD|WHR. All SNPs are listed with their nearest  
79 gene(s), chromosomal location, effect allele A1, non-effect allele A2, raw p-values for univariate GWAS for each trait and cFDR values for FN  
80 BMD.
